# Supplementary material
Source: PubMed Central journal article supplement (PMC3346140)
Supplement: supp_M111.333450_jbc.M111.333450-1.pdf [file supp_M111.333450_jbc.M111.333450-1.pdf]

**Supplementary Table 1. List of TDP-43 mRNA targets identified by RIP-chip analysis.**  
 FC, Fold change value; \*, asterisk indicates TDP-43 RNA targets identified also by other groups.

| SYMBOL                | FC   | SYMBOL               | FC    | SYMBOL         | FC    | SYMBOL           | FC   | SYMBOL            | FC   |
|-----------------------|------|----------------------|-------|----------------|-------|------------------|------|-------------------|------|
| <i>1110032A03Rik</i>  | 6,5  | <i>Chst15</i>        | 17,2  | <i>Gtpbp1</i>  | 3,3   | <i>Nudcd3</i>    | 15,5 | <i>St3gal5</i>    | 12,3 |
| <i>3110082I17Rik</i>  | 14,5 | <i>Creb5</i>         | 4,3   | <i>Hdac7</i>   | 4,0   | <i>Orai1</i>     | 10,0 | <i>St6galnac5</i> | 4,5  |
| <i>4930427A07Rik</i>  | 4,5  | <i>Creld1</i>        | 3,3   | <i>Hic2</i>    | 3,4   | <i>Pacs2</i>     | 14,7 | <i>Stx16</i>      | 3,4  |
| <i>4933439F18Rik</i>  | 59,7 | <i>Cry2</i>          | 44,2  | <i>Hk2</i>     | 5,4   | <i>Pak4</i>      | 26,4 | <i>Svopl</i>      | 39,2 |
| <i>5930434B04Rik</i>  | 6,6  | <i>Csnk1e</i>        | 9,9   | <i>Hlcs</i>    | 7,5   | <i>Pdp2</i>      | 3,8  | <i>Tbc1d13</i>    | 21,4 |
| <i>6330578E17Rik</i>  | 9,0  | <i>Cyb5r1</i>        | 24,5  | <i>Igsf3</i>   | 8,2   | <i>Pdpk1</i>     | 8,4  | <i>Tbc1d22b</i>   | 15,9 |
| <i>9030624J02Rik</i>  | 4,3  | <i>Cyp2u1</i>        | 412,0 | <i>Igsf9*</i>  | 22,2  | <i>Pfkfb2</i>    | 3,2  | <i>Tcf15</i>      | 17,9 |
| <i>Actr1a</i>         | 4,5  | <i>D16Ert472e</i>    | 3,3   | <i>Ikzf4</i>   | 171,5 | <i>Pigl</i>      | 6,3  | <i>Th1l</i>       | 10,3 |
| <i>Adam19</i>         | 9,3  | <i>D17Wsu104e</i>    | 3,3   | <i>Il11ra1</i> | 7,0   | <i>Plekha2</i>   | 8,1  | <i>Tmem179</i>    | 14,9 |
| <i>Adamts4</i>        | 5,2  | <i>D19Wsu162e</i>    | 8,8   | <i>Il17rd</i>  | 4,9   | <i>Prkg1*</i>    | 6,2  | <i>Tmem201</i>    | 11,1 |
| <i>Adcy6</i>          | 5,4  | <i>Darc</i>          | 55,1  | <i>Itpk1</i>   | 25,4  | <i>Prr3</i>      | 3,4  | <i>Tmem65</i>     | 3,1  |
| <i>Adm</i>            | 10,7 | <i>Dcaf12</i>        | 25,2  | <i>Kcnj12</i>  | 9,6   | <i>Rab8b</i>     | 4,8  | <i>Tnrc6c</i>     | 4,0  |
| <i>Agpat4</i>         | 18,6 | <i>Diras2</i>        | 12,7  | <i>Kif3c</i>   | 13,4  | <i>Rad51c</i>    | 8,5  | <i>Trak1</i>      | 5,9  |
| <i>Aif1l</i>          | 6,8  | <i>Dnajb1</i>        | 19,2  | <i>Klf13</i>   | 7,1   | <i>Rap2a</i>     | 5,2  | <i>Trmt61a</i>    | 20,5 |
| <i>AL024069</i>       | 14,8 | <i>Dtx4</i>          | 6,2   | <i>Klhl21</i>  | 19,4  | <i>Rapgef1l</i>  | 36,4 | <i>Unc5b</i>      | 5,1  |
| <i>Ankrd61</i>        | 5,4  | <i>E2f1</i>          | 17,2  | <i>L2hgdh</i>  | 3,9   | <i>Reep4</i>     | 37,9 | <i>Unc5c</i>      | 4,6  |
| <i>Ap2s1</i>          | 22,0 | <i>Eif1ad</i>        | 18,7  | <i>Lasp1</i>   | 10,3  | <i>Rgl1</i>      | 11,6 | <i>Ung</i>        | 11,4 |
| <i>Arf3</i>           | 31,1 | <i>Ets1*</i>         | 4,2   | <i>Ldlrad3</i> | 12,0  | <i>Rgs8</i>      | 8,1  | <i>Usf2</i>       | 12,8 |
| <i>Arhgap23</i>       | 9,7  | <i>F730047E07Rik</i> | 17,3  | <i>Lonrf1</i>  | 6,5   | <i>Rhbdl3</i>    | 14,6 | <i>Utp23</i>      | 3,4  |
| <i>Arhgap8</i>        | 52,5 | <i>Fam168b</i>       | 4,2   | <i>Lrp8</i>    | 24,6  | <i>Rnf219</i>    | 5,5  | <i>Vax2</i>       | 38,9 |
| <i>Arhgef15</i>       | 8,3  | <i>Fam178a</i>       | 3,9   | <i>Lrpprc*</i> | 15,6  | <i>Rnf5</i>      | 9,2  | <i>Vegfa*</i>     | 3,2  |
| <i>Arl5b</i>          | 3,9  | <i>Fam53c</i>        | 30,0  | <i>Mapk14</i>  | 4,3   | <i>Rragd</i>     | 3,4  | <i>Wdr59</i>      | 5,4  |
| <i>Armc8</i>          | 7,7  | <i>Fam78b</i>        | 19,1  | <i>Max</i>     | 5,9   | <i>Sept3*</i>    | 21,1 | <i>Wfs1</i>       | 17,7 |
| <i>AW555464</i>       | 33,7 | <i>Fhod1</i>         | 18,1  | <i>Mcph1</i>   | 7,2   | <i>Serpinb8*</i> | 8,0  | <i>Wnt5a</i>      | 6,7  |
| <i>B230312A22Rik</i>  | 26,7 | <i>Fnbp1*</i>        | 41,7  | <i>Mmab</i>    | 13,4  | <i>Sgms1</i>     | 4,0  | <i>Zcchc9</i>     | 7,4  |
| <i>BC017612</i>       | 7,5  | <i>Foxj3</i>         | 5,7   | <i>Mobkl2c</i> | 5,0   | <i>Shisa5</i>    | 7,4  | <i>Zdhhc24</i>    | 8,7  |
| <i>BC065397</i>       | 11,6 | <i>Frat2</i>         | 10,1  | <i>Msl1</i>    | 4,2   | <i>Slc11a2</i>   | 24,8 | <i>Zdhhc7</i>     | 16,4 |
| <i>Ccdc25</i>         | 4,3  | <i>Fzd5</i>          | 3,6   | <i>Myadm</i>   | 15,8  | <i>Slc25a46</i>  | 6,4  | <i>Zfp180*</i>    | 12,9 |
| <i>Ccnt1*</i>         | 3,0  | <i>Gdi1</i>          | 17,8  | <i>Nacc2</i>   | 12,9  | <i>Slc6a8</i>    | 6,1  | <i>Zfp382</i>     | 5,0  |
| <i>Cd1d1</i>          | 18,0 | <i>Gemin7</i>        | 10,6  | <i>Ndrp2*</i>  | 10,2  | <i>Spag7</i>     | 12,1 | <i>Zfp46</i>      | 9,9  |
| <i>Cdk5r1</i>         | 5,6  | <i>Gm347</i>         | 15,8  | <i>Neurl1B</i> | 18,4  | <i>Spock2</i>    | 27,2 | <i>Zfp689</i>     | 22,1 |
| <i>Celf4/Brunol4*</i> | 6,5  | <i>Gng8</i>          | 3,5   | <i>Nfatc4</i>  | 15,1  | <i>Spop</i>      | 3,7  | <i>Zxdc</i>       | 9,8  |
| <i>Cfp</i>            | 3,5  | <i>Grn*</i>          | 7,9   | <i>Nrf1</i>    | 8,6   | <i>Srgap3</i>    | 34,8 |                   |      |
| <i>Chek1</i>          | 7,3  | <i>Gsk3b*</i>        | 9,2   | <i>Nrp</i>     | 5,5   | <i>Ss18l1*</i>   | 8,8  |                   |      |

**Supplementary Table 2. List of FUS mRNA targets identified by RIP-chip analysis.**  
 FC, Fold change value. \*, asterisk indicates FUS RNA targets identified by Hoell et al (2011).

| SYMBOL        | FC   | SYMBOL        | FC   | SYMBOL        | FC   | SYMBOL   | FC   | SYMBOL      | FC   |
|---------------|------|---------------|------|---------------|------|----------|------|-------------|------|
| 1200011I18Rik | 5,8  | AI314180      | 7,9  | BC003993      | 13,5 | Ccdc111  | 5,5  | Cnot4*      | 6,4  |
| 1200014J11Rik | 10,0 | AI481100      | 3,0  | BC005471      | 3,5  | Ccdc123  | 3,0  | Cnst*       | 3,3  |
| 1200016B10Rik | 9,9  | Aim2          | 7,6  | BC006583      | 3,1  | Ccdc127  | 6,0  | Cobll1*     | 14,2 |
| 2310012P17Rik | 4,9  | Akap8*        | 4,3  | BC025920      | 7,9  | Ccdc132* | 4,2  | Col4a3bp*   | 3,2  |
| 2610044O15Rik | 8,0  | Akt3*         | 4,3  | BC027088      | 4,2  | Ccdc38   | 22,2 | Copb2*      | 3,1  |
| 2610305D13Rik | 3,7  | Aldh1l2       | 4,2  | BC033596      | 5,1  | Ccdc41*  | 21,0 | Cpsf2*      | 11,2 |
| 2810021B07Rik | 3,2  | Alkbh8*       | 11,8 | BC038156      | 4,5  | Ccdc45*  | 5,6  | Crnk1       | 8,0  |
| 2900006K08Rik | 5,5  | Ankle2*       | 9,6  | BC050092      | 9,6  | Ccdc47   | 4,3  | Csde1*      | 5,7  |
| 4732471D19Rik | 8,2  | Ankrd12*      | 14,2 | BC062115      | 4,0  | Ccdc75   | 6,7  | Csnk1g3*    | 4,6  |
| 4930455F23Rik | 6,3  | Anp32e*       | 3,2  | BC062951      | 42,5 | Ccdc77*  | 9,9  | Cspp1*      | 10,2 |
| 4930503L19Rik | 3,7  | Ap3b1*        | 7,3  | BC066028      | 7,3  | Ccdc88a* | 10,8 | Ctcf*       | 8,1  |
| 4930506M07Rik | 10,6 | Apbb2*        | 4,1  | Bcor*         | 5,4  | Ccm1     | 8,9  | Ctdspl2*    | 4,1  |
| 4930547N16Rik | 6,0  | Aplf*         | 4,2  | Bhlhb9        | 4,5  | Ccp1*    | 8,9  | Ctnna1*     | 7,3  |
| 4931406C07Rik | 3,0  | Appl1*        | 5,1  | Bicc1*        | 9,7  | Cdc27*   | 3,4  | Cul1*       | 5,2  |
| 4933411K20Rik | 11,5 | Aprin         | 9,9  | Birc1b        | 4,5  | Cdc2l5   | 5,5  | Cul2*       | 4,9  |
| 4933424B01Rik | 4,5  | Aqr*          | 7,6  | Birc2*        | 4,7  | Cdc5l*   | 11,5 | Cul3*       | 11,2 |
| 5832424M12    | 4,2  | Arcn1*        | 4,9  | Blm*          | 12,9 | cdc73*   | 5,8  | Cul4b*      | 9,2  |
| 6330407J23Rik | 3,2  | Arhgap12*     | 7,0  | Bms1l         | 29,1 | Cdk19*   | 3,5  | Cul5*       | 8,9  |
| 6330408A02Rik | 6,2  | Arhgap18*     | 9,6  | Bnc2*         | 5,4  | Cdkl2    | 5,8  | Cwf19l2*    | 16,5 |
| 6330503K22Rik | 13,7 | Arhgap26*     | 9,6  | Bod1l*        | 7,5  | Cdnf     | 3,8  | Cxxc4*      | 5,1  |
| 8430410K20Rik | 6,5  | Arhgap29*     | 16,1 | Brd8*         | 4,9  | Cdv3*    | 3,5  | Cyld*       | 6,6  |
| 9030425E11Rik | 14,5 | Arid2*        | 7,8  | Brms1l*       | 4,1  | Cebpg*   | 3,3  | D10Bwg1379e | 4,2  |
| 9330134C04Rik | 15,7 | Arntl*        | 3,3  | Brox          | 3,1  | Cep120*  | 6,2  | D19Bwg1357e | 4,8  |
| A830080D01Rik | 12,0 | Ate1*         | 3,7  | Btbd1*        | 3,3  | Cep170*  | 25,8 | D5Erd579e   | 6,6  |
| AA536749      | 4,6  | Atf7ip*       | 11,9 | Btbd12        | 3,3  | Cep57*   | 4,5  | Dbf4*       | 3,5  |
| Aadacl1       | 3,3  | Attp          | 5,4  | Bteb1         | 5,9  | Cep63    | 12,4 | Ddef1       | 5,6  |
| Abcf1         | 7,0  | Atxn2*        | 7,7  | Bub1b*        | 4,9  | Cep70*   | 17,0 | Ddrgk1*     | 3,0  |
| Acadsb*       | 4,4  | AU019823      | 4,3  | C030039L03Rik | 39,0 | Cftr     | 6,6  | Ddx19b      | 3,0  |
| Acbd3*        | 5,6  | AW046396      | 4,1  | C130022K22Rik | 4,6  | Cggbp1*  | 3,0  | Ddx21*      | 12,9 |
| Acin1         | 5,7  | AW060766      | 9,8  | C1galt1*      | 6,8  | Chaf1a*  | 3,4  | Ddx27       | 3,3  |
| Adam17*       | 6,0  | AW544865      | 3,9  | C78212        | 3,7  | Chd8*    | 4,4  | Ddx3x*      | 8,4  |
| Adnp*         | 10,3 | AW550801      | 3,9  | C79407        | 13,7 | Chgb     | 23,1 | Ddx46*      | 12,8 |
| Aff1*         | 3,9  | Axin2         | 3,0  | C80913        | 5,3  | Cir1*    | 4,7  | Ddx52*      | 4,7  |
| Aftph*        | 4,2  | Axot          | 5,6  | Calr4         | 4,4  | Ckap2l*  | 12,6 | Dgkg        | 3,7  |
| Aggf1*        | 9,7  | Azi1          | 8,0  | Capn7*        | 6,7  | Ckap5*   | 11,3 | Dhx29*      | 16,2 |
| Agps*         | 4,1  | B230219D22Rik | 3,2  | Cask*         | 4,6  | Clock*   | 8,1  | Dhx36*      | 5,8  |
| Agtrap*       | 3,2  | BB128963      | 97,5 | Catnal1       | 5,7  | Clp1     | 6,4  | Dhx38       | 3,2  |
| Ahi1*         | 9,5  | Bbs12         | 8,8  | Cc2d2a        | 16,2 | Clpx*    | 3,3  | Dicer1*     | 4,9  |
| Ahnak         | 5,1  | BC002199      | 3,2  | Ccar1*        | 16,8 | Cnot2*   | 3,5  | Disp1       | 8,7  |

| SYMBOL           | FC   | SYMBOL          | FC   | SYMBOL          | FC   | SYMBOL           | FC    | SYMBOL           | FC   |
|------------------|------|-----------------|------|-----------------|------|------------------|-------|------------------|------|
| <i>Dlat*</i>     | 3,7  | <i>Etaa1*</i>   | 11,7 | <i>Golga1*</i>  | 18,1 | <i>Immt*</i>     | 3,8   | <i>Luzp1*</i>    | 13,4 |
| <i>Dlgap5*</i>   | 8,2  | <i>Etf1*</i>    | 3,8  | <i>Golga2</i>   | 7,4  | <i>Ing1l</i>     | 3,2   | <i>Man1a2*</i>   | 8,2  |
| <i>Dlgh2</i>     | 5,7  | <i>Evi5*</i>    | 8,6  | <i>Golga3*</i>  | 28,3 | <i>Ino80*</i>    | 3,9   | <i>Map3k7ip3</i> | 12,0 |
| <i>Dmtf1*</i>    | 9,6  | <i>Exoc6*</i>   | 9,1  | <i>Golga5*</i>  | 10,9 | <i>Inpp5f*</i>   | 4,8   | <i>Map4k4*</i>   | 5,7  |
| <i>Dnaja2*</i>   | 5,1  | <i>F8</i>       | 9,9  | <i>Golph2</i>   | 4,9  | <i>Iqcb1*</i>    | 4,5   | <i>Mapk8*</i>    | 3,3  |
| <i>Dnajc14*</i>  | 8,1  | <i>Faf2*</i>    | 3,9  | <i>Gpatch1*</i> | 11,0 | <i>Its1*</i>     | 3,5   | <i>March11</i>   | 7,1  |
| <i>Dnajc2*</i>   | 8,2  | <i>Fam111a</i>  | 18,8 | <i>Gpatch2*</i> | 4,3  | <i>Iws1*</i>     | 302,6 | <i>Mark3*</i>    | 5,2  |
| <i>Dnajc3*</i>   | 12,1 | <i>Fam114a1</i> | 5,1  | <i>Gpatch4</i>  | 3,1  | <i>Jak2*</i>     | 9,9   | <i>Mast2*</i>    | 3,8  |
| <i>Dnm1l*</i>    | 10,8 | <i>Fam168a*</i> | 4,1  | <i>Gbbp1*</i>   | 11,7 | <i>Kdm4c*</i>    | 7,9   | <i>Matr3*</i>    | 5,1  |
| <i>Dnmt1*</i>    | 3,6  | <i>Fam171b*</i> | 10,2 | <i>Gphn*</i>    | 3,1  | <i>Kif11*</i>    | 9,6   | <i>Mbd4</i>      | 3,7  |
| <i>Dpp8*</i>     | 4,9  | <i>Fam175b*</i> | 3,3  | <i>Gpiap1</i>   | 5,5  | <i>Kif13a*</i>   | 4,2   | <i>Mbd5*</i>     | 27,7 |
| <i>Drctnbn1a</i> | 6,6  | <i>Fam178a*</i> | 7,5  | <i>Gpr22</i>    | 11,8 | <i>Kif18a*</i>   | 6,6   | <i>Mbtd1*</i>    | 9,1  |
| <i>Echdc1*</i>   | 6,9  | <i>Fam49a</i>   | 8,1  | <i>Gripap1*</i> | 5,9  | <i>Kif1b*</i>    | 3,8   | <i>Mdm2*</i>     | 4,7  |
| <i>Edd1</i>      | 5,3  | <i>Fam63b*</i>  | 7,2  | <i>Gspt1*</i>   | 3,1  | <i>Kif2a*</i>    | 9,4   | <i>Mfap1b</i>    | 5,1  |
| <i>Efcab2*</i>   | 12,9 | <i>Fam76b*</i>  | 3,6  | <i>Gspt2*</i>   | 3,2  | <i>Kif3a*</i>    | 9,8   | <i>Mgea6</i>     | 4,2  |
| <i>Efcbp1</i>    | 5,8  | <i>Fbf1</i>     | 3,5  | <i>Gtf2h1*</i>  | 4,1  | <i>Kif4</i>      | 19,6  | <i>Mier1*</i>    | 6,0  |
| <i>Eftud1*</i>   | 9,1  | <i>Fbxo30*</i>  | 5,9  | <i>Gtpbp4*</i>  | 8,4  | <i>Kif5c*</i>    | 5,9   | <i>Mint</i>      | 14,0 |
| <i>Ehbp1*</i>    | 7,9  | <i>Fbxo38*</i>  | 3,3  | <i>Gxylt1*</i>  | 7,5  | <i>Kifap3*</i>   | 3,7   | <i>Mios*</i>     | 5,7  |
| <i>Eif1a</i>     | 4,1  | <i>Fchsd2*</i>  | 4,5  | <i>Gzf1</i>     | 5,9  | <i>Kpna3*</i>    | 5,2   | <i>Mlh3</i>      | 7,2  |
| <i>Eif2ak2</i>   | 20,1 | <i>Fcmd</i>     | 5,6  | <i>Haus6*</i>   | 6,1  | <i>Kpnb3</i>     | 3,6   | <i>Mns1</i>      | 8,4  |
| <i>Eif2s2*</i>   | 3,8  | <i>Fem1b*</i>   | 3,3  | <i>Hdlbp*</i>   | 7,9  | <i>Krr1*</i>     | 34,3  | <i>Morc3*</i>    | 9,2  |
| <i>Eif3s1</i>    | 7,3  | <i>Fert2</i>    | 6,6  | <i>Helz*</i>    | 8,1  | <i>Laf4l</i>     | 5,7   | <i>Mpp6*</i>     | 5,6  |
| <i>Eif3s10</i>   | 17,8 | <i>Fgd6</i>     | 4,8  | <i>Hif1a*</i>   | 3,3  | <i>Lamc1*</i>    | 4,4   | <i>Mre11a*</i>   | 4,3  |
| <i>Eif3s8</i>    | 3,9  | <i>Fgfr1op*</i> | 4,1  | <i>Hirip3</i>   | 6,1  | <i>Lars*</i>     | 3,4   | <i>Mrg1</i>      | 4,9  |
| <i>Eif4enif1</i> | 4,3  | <i>Fign*</i>    | 4,4  | <i>Hmgb2l1</i>  | 4,4  | <i>Leng1</i>     | 5,1   | <i>Mrvi1</i>     | 3,9  |
| <i>Eif4g1*</i>   | 6,6  | <i>Fnbp1l*</i>  | 9,4  | <i>Hmgcs1*</i>  | 3,3  | <i>Leo1</i>      | 11,4  | <i>Msh6*</i>     | 8,4  |
| <i>Eif5*</i>     | 4,4  | <i>Fnbp3</i>    | 13,9 | <i>Hnrph1</i>   | 5,1  | <i>Lhx1</i>      | 3,3   | <i>Mtap2</i>     | 5,3  |
| <i>Eif1*</i>     | 5,4  | <i>Fnip1*</i>   | 7,1  | <i>Hnrpm</i>    | 6,2  | <i>Lig4*</i>     | 7,6   | <i>Mtap7</i>     | 5,2  |
| <i>Elovl6*</i>   | 6,1  | <i>Foxp1*</i>   | 4,4  | <i>Hook3*</i>   | 17,7 | <i>Lima1*</i>    | 11,8  | <i>Mtdh*</i>     | 6,3  |
| <i>Eml4*</i>     | 5,8  | <i>Frmf6*</i>   | 3,5  | <i>Hrb2</i>     | 4,3  | <i>Lin54*</i>    | 5,7   | <i>Mtf2*</i>     | 5,2  |
| <i>Enox1*</i>    | 3,4  | <i>Ftsj3</i>    | 8,0  | <i>Hs2st1*</i>  | 3,1  | <i>Lin7c*</i>    | 3,3   | <i>Mtmr1*</i>    | 6,8  |
| <i>Enpp4*</i>    | 3,8  | <i>Fubp1*</i>   | 4,2  | <i>Hspa4*</i>   | 8,7  | <i>Lman1*</i>    | 5,0   | <i>Myef2*</i>    | 7,8  |
| <i>Epb4.1</i>    | 10,3 | <i>Gabpa*</i>   | 4,2  | <i>Hspa9*</i>   | 3,3  | <i>Lmbr1*</i>    | 5,5   | <i>Myh9*</i>     | 4,0  |
| <i>Epb4.1l3</i>  | 7,5  | <i>Ganc*</i>    | 3,0  | <i>Hspd1*</i>   | 3,4  | <i>LOC228730</i> | 4,4   | <i>Myo18a*</i>   | 3,2  |
| <i>Epc2*</i>     | 9,2  | <i>Gapvd1*</i>  | 4,4  | <i>Hsph1</i>    | 5,5  | <i>LOC237408</i> | 4,4   | <i>Myo1b*</i>    | 7,6  |
| <i>Eprs*</i>     | 22,2 | <i>Gbif</i>     | 3,4  | <i>Ibtk*</i>    | 5,1  | <i>LOC239102</i> | 4,9   | <i>Myo6*</i>     | 8,8  |
| <i>Erc2*</i>     | 9,5  | <i>Gcap14</i>   | 8,2  | <i>Ide*</i>     | 3,5  | <i>LOC433801</i> | 12,8  | <i>Myt1*</i>     | 3,9  |
| <i>Ercc5*</i>    | 16,2 | <i>Gcc2*</i>    | 30,6 | <i>Ift80*</i>   | 6,4  | <i>LOC433886</i> | 14,1  | <i>Nab1*</i>     | 4,8  |
| <i>Ergic2*</i>   | 3,2  | <i>Gdap1*</i>   | 4,5  | <i>Ift81*</i>   | 11,3 | <i>Lpl</i>       | 3,5   | <i>Nap1l1*</i>   | 3,6  |
| <i>Eri1*</i>     | 6,0  | <i>Ggnbp2</i>   | 7,8  | <i>Ift88</i>    | 14,1 | <i>Lrrc40*</i>   | 8,1   | <i>Narg1</i>     | 10,8 |
| <i>Eri2*</i>     | 4,1  | <i>Gm13154</i>  | 9,8  | <i>Igfbp5*</i>  | 6,5  | <i>Lrrfip1*</i>  | 3,4   | <i>Narg1l</i>    | 3,3  |
| <i>Esco1*</i>    | 8,2  | <i>Gnl2*</i>    | 6,1  | <i>Ik*</i>      | 6,7  | <i>Lrrn3</i>     | 10,8  | <i>Narg2*</i>    | 6,5  |
| <i>Esco2*</i>    | 3,2  | <i>Gnptab*</i>  | 7,7  | <i>Ikzf5*</i>   | 4,9  | <i>Luc7l3*</i>   | 6,4   | <i>Nav1</i>      | 3,5  |

| SYMBOL          | FC   | SYMBOL          | FC   | SYMBOL            | FC   | SYMBOL           | FC   | SYMBOL           | FC   |
|-----------------|------|-----------------|------|-------------------|------|------------------|------|------------------|------|
| <i>Ncapd3*</i>  | 3,6  | <i>Pibf1*</i>   | 15,0 | <i>Pum2*</i>      | 4,7  | <i>Rpap3*</i>    | 5,3  | <i>Slc39a6</i>   | 3,1  |
| <i>Ncl*</i>     | 20,6 | <i>Picalm*</i>  | 7,6  | <i>Pus10*</i>     | 3,8  | <i>Rpo1-4</i>    | 5,1  | <i>Slc4a1ap</i>  | 7,3  |
| <i>Ncoa6*</i>   | 13,2 | <i>Pigy*</i>    | 10,9 | <i>Rab11fip2*</i> | 5,8  | <i>Rpo2tc1</i>   | 3,2  | <i>Slmap*</i>    | 11,5 |
| <i>Ncoa6ip</i>  | 17,1 | <i>Pik3ca*</i>  | 6,3  | <i>Rab22a*</i>    | 3,0  | <i>Rps15a*</i>   | 3,3  | <i>Sltm*</i>     | 16,4 |
| <i>Ndc80*</i>   | 9,6  | <i>Pik3cb*</i>  | 3,4  | <i>Rab33b*</i>    | 4,1  | <i>Rps6ka3*</i>  | 3,5  | <i>Slu7*</i>     | 9,6  |
| <i>Neo1*</i>    | 4,7  | <i>Pik3r3*</i>  | 7,0  | <i>Rab39</i>      | 3,8  | <i>Rrbp1*</i>    | 25,9 | <i>Smarca1*</i>  | 10,9 |
| <i>Nfib*</i>    | 4,7  | <i>Pip5k2a</i>  | 3,4  | <i>Rab39b</i>     | 3,1  | <i>Rrp15*</i>    | 3,3  | <i>Smarcad1*</i> | 9,2  |
| <i>Niban</i>    | 4,9  | <i>Pja2*</i>    | 4,3  | <i>Rab3gap1*</i>  | 3,1  | <i>Rrp1b*</i>    | 3,3  | <i>Smarcc1*</i>  | 17,9 |
| <i>Nin*</i>     | 30,0 | <i>Plcl2*</i>   | 4,2  | <i>Rabep1*</i>    | 19,5 | <i>Rsrc1*</i>    | 4,6  | <i>Smarcc2</i>   | 9,2  |
| <i>Nkap*</i>    | 9,6  | <i>Pld1*</i>    | 5,7  | <i>Rabgap1*</i>   | 8,7  | <i>Rufy3*</i>    | 4,7  | <i>Smarce1*</i>  | 4,1  |
| <i>Nkrf*</i>    | 9,2  | <i>Plek</i>     | 13,0 | <i>Rad17</i>      | 3,7  | <i>Sacm11*</i>   | 3,5  | <i>Smc5l1</i>    | 16,5 |
| <i>Noc3l*</i>   | 8,2  | <i>Plekhc1</i>  | 3,0  | <i>Rad21*</i>     | 29,2 | <i>Sap130*</i>   | 4,9  | <i>Smc6*</i>     | 29,7 |
| <i>Nolc1*</i>   | 11,5 | <i>Plk1s1*</i>  | 5,1  | <i>Ralbp1*</i>    | 11,6 | <i>Sart1</i>     | 9,8  | <i>Smchd1*</i>   | 8,6  |
| <i>Nop14*</i>   | 12,0 | <i>Plk4*</i>    | 6,0  | <i>Ralgapb*</i>   | 3,8  | <i>Sbno1</i>     | 10,2 | <i>Smek2*</i>    | 10,2 |
| <i>Nop58*</i>   | 5,3  | <i>Plod2*</i>   | 4,3  | <i>Rapgef6*</i>   | 14,8 | <i>Scel</i>      | 9,8  | <i>Smg6*</i>     | 6,4  |
| <i>Nrcam*</i>   | 6,1  | <i>Pnla8</i>    | 7,3  | <i>Rars*</i>      | 3,2  | <i>Scg2</i>      | 8,8  | <i>Smg7*</i>     | 4,2  |
| <i>Nrd1*</i>    | 10,2 | <i>Pnma2*</i>   | 5,7  | <i>Rasa1*</i>     | 10,9 | <i>Scg3</i>      | 4,0  | <i>Snx13*</i>    | 13,2 |
| <i>Nsun2*</i>   | 4,0  | <i>Pnpla1</i>   | 7,7  | <i>Rasa2*</i>     | 7,2  | <i>Sdad1*</i>    | 4,7  | <i>Snx14*</i>    | 3,9  |
| <i>Numa1</i>    | 7,3  | <i>Poli*</i>    | 3,9  | <i>Rb1*</i>       | 4,9  | <i>Sec24b*</i>   | 3,5  | <i>Socs5*</i>    | 5,6  |
| <i>Nup98*</i>   | 4,0  | <i>Polk*</i>    | 10,8 | <i>Rbak*</i>      | 3,2  | <i>Sec5l1</i>    | 3,8  | <i>Sos1*</i>     | 5,5  |
| <i>Nusap1*</i>  | 4,0  | <i>Polr3b*</i>  | 4,6  | <i>Rbl1*</i>      | 4,1  | <i>Sec63*</i>    | 10,7 | <i>Sp4*</i>      | 22,4 |
| <i>Nvl*</i>     | 4,5  | <i>Ppip5k2*</i> | 9,3  | <i>Rbm12</i>      | 6,9  | <i>Sec8l1</i>    | 3,9  | <i>Spag1*</i>    | 4,9  |
| <i>Onecut2*</i> | 5,3  | <i>Ppm1e*</i>   | 5,9  | <i>Rbm15*</i>     | 3,5  | <i>Senp2*</i>    | 4,5  | <i>Specc1*</i>   | 5,6  |
| <i>Optn</i>     | 4,4  | <i>Ppp1r9a*</i> | 6,5  | <i>Rbm16*</i>     | 7,6  | <i>Senp5</i>     | 5,0  | <i>Spred1*</i>   | 4,3  |
| <i>Osbp16*</i>  | 3,1  | <i>Ppp2r5e*</i> | 4,4  | <i>Rbm26*</i>     | 12,1 | <i>Senp6*</i>    | 23,3 | <i>Srp72*</i>    | 6,3  |
| <i>Osbp18*</i>  | 5,1  | <i>Prc1*</i>    | 6,8  | <i>Recc1</i>      | 24,8 | <i>Senp8*</i>    | 4,4  | <i>Srpk2*</i>    | 4,6  |
| <i>Osp94</i>    | 13,2 | <i>Prkca*</i>   | 3,8  | <i>Rev1*</i>      | 3,5  | <i>Serbp1*</i>   | 3,9  | <i>Srsf11*</i>   | 3,5  |
| <i>Oxr1*</i>    | 4,3  | <i>Prkce*</i>   | 4,0  | <i>Rggef*</i>     | 12,4 | <i>Setd5*</i>    | 4,0  | <i>Ssfa2*</i>    | 3,9  |
| <i>Papolg*</i>  | 5,3  | <i>Prkg2*</i>   | 3,6  | <i>Rgs7bp</i>     | 4,1  | <i>Setd8*</i>    | 3,4  | <i>Ssx2ip*</i>   | 7,8  |
| <i>Parm1*</i>   | 3,1  | <i>Prpf18</i>   | 3,4  | <i>Rhobtb3*</i>   | 3,6  | <i>Setdb2</i>    | 5,7  | <i>Stag2*</i>    | 10,1 |
| <i>Parp8*</i>   | 3,7  | <i>Prpf3*</i>   | 4,0  | <i>Ric3</i>       | 5,2  | <i>Sfrs6</i>     | 3,1  | <i>Stau1*</i>    | 3,3  |
| <i>Pbrm1*</i>   | 16,9 | <i>Prpf38b*</i> | 6,4  | <i>Rims2*</i>     | 14,6 | <i>Sgip1*</i>    | 6,2  | <i>Stk3*</i>     | 6,3  |
| <i>Pcdhb22</i>  | 20,0 | <i>Prpf39*</i>  | 11,8 | <i>Riok1</i>      | 3,2  | <i>Sh2bp1</i>    | 29,9 | <i>Stk32a</i>    | 3,7  |
| <i>Pcf11*</i>   | 14,5 | <i>Prpf6</i>    | 3,3  | <i>Ripk1</i>      | 5,5  | <i>Sh3d1B</i>    | 6,4  | <i>Stox2*</i>    | 7,0  |
| <i>Pcyt1b</i>   | 3,1  | <i>Psg23</i>    | 4,2  | <i>Rlim*</i>      | 15,9 | <i>Sh3kbp1*</i>  | 4,8  | <i>Strbp*</i>    | 10,6 |
| <i>Pde5a*</i>   | 3,9  | <i>Psip1*</i>   | 12,1 | <i>Rnasen</i>     | 7,1  | <i>Sin3a</i>     | 5,0  | <i>Strn3*</i>    | 8,7  |
| <i>Pdha1*</i>   | 3,2  | <i>Psmd1*</i>   | 3,8  | <i>Rnf113a2</i>   | 8,0  | <i>Sipa111*</i>  | 6,2  | <i>Stxbp4*</i>   | 4,6  |
| <i>Pdzd8*</i>   | 24,0 | <i>Ptgir</i>    | 3,4  | <i>Rnf168*</i>    | 4,4  | <i>Sirt1*</i>    | 3,5  | <i>Supt6h*</i>   | 6,9  |
| <i>Pet2</i>     | 15,7 | <i>Ptk2*</i>    | 4,2  | <i>Rnf19a*</i>    | 5,3  | <i>Skiip</i>     | 4,8  | <i>Surf6</i>     | 3,5  |
| <i>Pex13</i>    | 4,0  | <i>Ptk9</i>     | 4,8  | <i>Rnf20</i>      | 12,7 | <i>Skiv2l2*</i>  | 10,6 | <i>Suv420h1*</i> | 6,7  |
| <i>Pftk1</i>    | 4,5  | <i>Ptpn11*</i>  | 3,9  | <i>Rnf214</i>     | 3,1  | <i>Slain2*</i>   | 7,5  | <i>Suz12*</i>    | 8,9  |
| <i>Phf14*</i>   | 17,1 | <i>Ptpn12*</i>  | 6,1  | <i>Rnf6*</i>      | 10,0 | <i>Slc35f3</i>   | 3,1  | <i>Swap70*</i>   | 4,6  |
| <i>Phf17*</i>   | 9,0  | <i>Ptpn21</i>   | 8,2  | <i>Robo1*</i>     | 7,3  | <i>Slc39a10*</i> | 25,4 | <i>Syt1</i>      | 6,7  |

| SYMBOL           | FC   | SYMBOL            | FC   | SYMBOL         | FC   | SYMBOL         | FC   | SYMBOL          | FC   |
|------------------|------|-------------------|------|----------------|------|----------------|------|-----------------|------|
| <i>Syt4</i>      | 5,1  | <i>Trim37*</i>    | 10,8 | <i>Utx</i>     | 4,0  | <i>Zfp101</i>  | 4,6  | <i>Zfp629</i>   | 3,7  |
| <i>Tacc1*</i>    | 6,2  | <i>Trim44*</i>    | 4,2  | <i>Vdp</i>     | 7,8  | <i>Zfp11</i>   | 3,3  | <i>Zfp644</i>   | 9,5  |
| <i>Taf15*</i>    | 8,3  | <i>Trip12*</i>    | 16,6 | <i>Vezf1*</i>  | 6,3  | <i>Zfp131</i>  | 4,3  | <i>Zfp654</i>   | 10,9 |
| <i>Tardbp*</i>   | 4,4  | <i>Trove2*</i>    | 4,0  | <i>Vil2</i>    | 4,8  | <i>Zfp143</i>  | 3,8  | <i>Zfp655</i>   | 9,5  |
| <i>Tars*</i>     | 4,1  | <i>Trp53bp2</i>   | 5,8  | <i>Vps54*</i>  | 6,0  | <i>Zfp160</i>  | 15,0 | <i>Zfp715</i>   | 5,4  |
| <i>Tarsl2</i>    | 5,3  | <i>Trps1*</i>     | 6,4  | <i>Wasl*</i>   | 3,1  | <i>Zfp187</i>  | 5,8  | <i>Zfp758</i>   | 24,9 |
| <i>Tax1bp1*</i>  | 12,6 | <i>Tspyl2</i>     | 4,8  | <i>Wbp4</i>    | 3,2  | <i>Zfp189</i>  | 16,6 | <i>Zfp760</i>   | 10,0 |
| <i>Tbc1d23*</i>  | 3,8  | <i>Ttc17*</i>     | 3,4  | <i>Wdr3*</i>   | 5,9  | <i>Zfp251</i>  | 3,9  | <i>Zfp763</i>   | 3,3  |
| <i>Tbc1d5*</i>   | 4,0  | <i>Ttc26*</i>     | 9,1  | <i>Wdr60*</i>  | 4,4  | <i>Zfp263</i>  | 3,3  | <i>Zfp770</i>   | 11,6 |
| <i>Tbk1*</i>     | 4,3  | <i>Tug1*</i>      | 3,4  | <i>Wdr67*</i>  | 4,4  | <i>Zfp280b</i> | 3,7  | <i>Zfp790</i>   | 6,4  |
| <i>Tceb3*</i>    | 8,7  | <i>Txln</i>       | 3,3  | <i>Wtap*</i>   | 3,1  | <i>Zfp280c</i> | 4,9  | <i>Zfp869</i>   | 3,4  |
| <i>Tcf4*</i>     | 4,6  | <i>Txlng*</i>     | 11,4 | <i>Wwp1*</i>   | 5,7  | <i>Zfp280d</i> | 6,3  | <i>Zfp943</i>   | 11,3 |
| <i>Tchp</i>      | 8,6  | <i>Ubc</i>        | 3,8  | <i>Xpc*</i>    | 3,6  | <i>Zfp281</i>  | 10,0 | <i>Zfp948</i>   | 8,1  |
| <i>Tdrd3*</i>    | 7,1  | <i>Ubn2*</i>      | 5,6  | <i>Yme111*</i> | 6,6  | <i>Zfp295</i>  | 3,1  | <i>Zfp97</i>    | 9,1  |
| <i>Thoc1*</i>    | 4,1  | <i>Ubr1*</i>      | 4,5  | <i>Ythdc1*</i> | 7,4  | <i>Zfp30*</i>  | 17,7 | <i>Zfr*</i>     | 6,9  |
| <i>Thumpd1</i>   | 6,6  | <i>Ufl1</i>       | 6,6  | <i>Zadh2*</i>  | 3,5  | <i>Zfp322a</i> | 12,7 | <i>Zfx*</i>     | 4,3  |
| <i>Tia1*</i>     | 4,2  | <i>Uhrf1bp1l*</i> | 8,1  | <i>Zbed4*</i>  | 5,0  | <i>Zfp354a</i> | 3,0  | <i>Zfyve16*</i> | 8,4  |
| <i>Tigd2</i>     | 7,2  | <i>Ulk2</i>       | 4,3  | <i>Zbtb1*</i>  | 7,1  | <i>Zfp37*</i>  | 16,9 | <i>Zfyve20*</i> | 7,1  |
| <i>Tjp1*</i>     | 26,8 | <i>Upf2*</i>      | 15,7 | <i>Zbtb41*</i> | 8,2  | <i>Zfp382</i>  | 4,7  | <i>Zhx1*</i>    | 9,7  |
| <i>Tlk1*</i>     | 8,1  | <i>Upf3a</i>      | 3,0  | <i>Zbtb5*</i>  | 3,5  | <i>Zfp39</i>   | 9,4  | <i>Zhx3*</i>    | 8,5  |
| <i>Tlk2*</i>     | 14,1 | <i>Ush2a</i>      | 3,2  | <i>Zc3h14*</i> | 3,3  | <i>Zfp397</i>  | 17,9 | <i>Zic4</i>     | 20,7 |
| <i>Tmem106b*</i> | 4,1  | <i>Usp12*</i>     | 5,3  | <i>Zc3h15*</i> | 6,3  | <i>Zfp420</i>  | 7,7  | <i>Zkscan1*</i> | 6,8  |
| <i>Tmem30a*</i>  | 3,7  | <i>Usp15*</i>     | 9,7  | <i>Zc3h7a</i>  | 5,1  | <i>Zfp451</i>  | 5,0  | <i>Zmym5*</i>   | 7,4  |
| <i>Tmem57</i>    | 9,6  | <i>Usp16*</i>     | 9,9  | <i>Zc3hdc6</i> | 12,9 | <i>Zfp457</i>  | 12,1 | <i>Zmynd11*</i> | 8,2  |
| <i>Tmod3*</i>    | 6,6  | <i>Usp33*</i>     | 4,7  | <i>Zcchc6*</i> | 17,4 | <i>Zfp512</i>  | 4,5  | <i>Znhit6*</i>  | 9,2  |
| <i>Tnrc6c*</i>   | 3,0  | <i>Usp37*</i>     | 5,6  | <i>Zcchc7*</i> | 3,3  | <i>Zfp537</i>  | 4,7  | <i>Zranb1*</i>  | 4,7  |
| <i>Top1*</i>     | 26,6 | <i>Usp47*</i>     | 13,7 | <i>Zcwcc1</i>  | 3,8  | <i>Zfp551</i>  | 3,3  | <i>Zranb3*</i>  | 3,7  |
| <i>Topors*</i>   | 13,8 | <i>Usp54*</i>     | 3,4  | <i>Zcwpw1</i>  | 3,5  | <i>Zfp597</i>  | 4,7  | <i>Zzz3*</i>    | 7,3  |
| <i>Tpp2*</i>     | 7,8  | <i>Usp6nl</i>     | 4,3  | <i>Zfhx1a</i>  | 10,6 | <i>Zfp60</i>   | 11,1 |                 |      |
| <i>Trak2</i>     | 5,4  | <i>Usp7*</i>      | 12,5 | <i>Zfhx2</i>   | 5,2  | <i>Zfp608</i>  | 5,1  |                 |      |
| <i>Trim33*</i>   | 19,3 | <i>Utp6</i>       | 7,0  | <i>Zfml</i>    | 13,8 | <i>Zfp62</i>   | 28,6 |                 |      |

**Supplementary Figure 1. FUS mRNA targets and the spliceosome pathway.** Using the functional annotation tool DAVID, the spliceosome pathway annotated by KEGG was found to be significantly represented ( $p < 0.05$ ). Stars indicate FUS targets that are involved in this pathway.

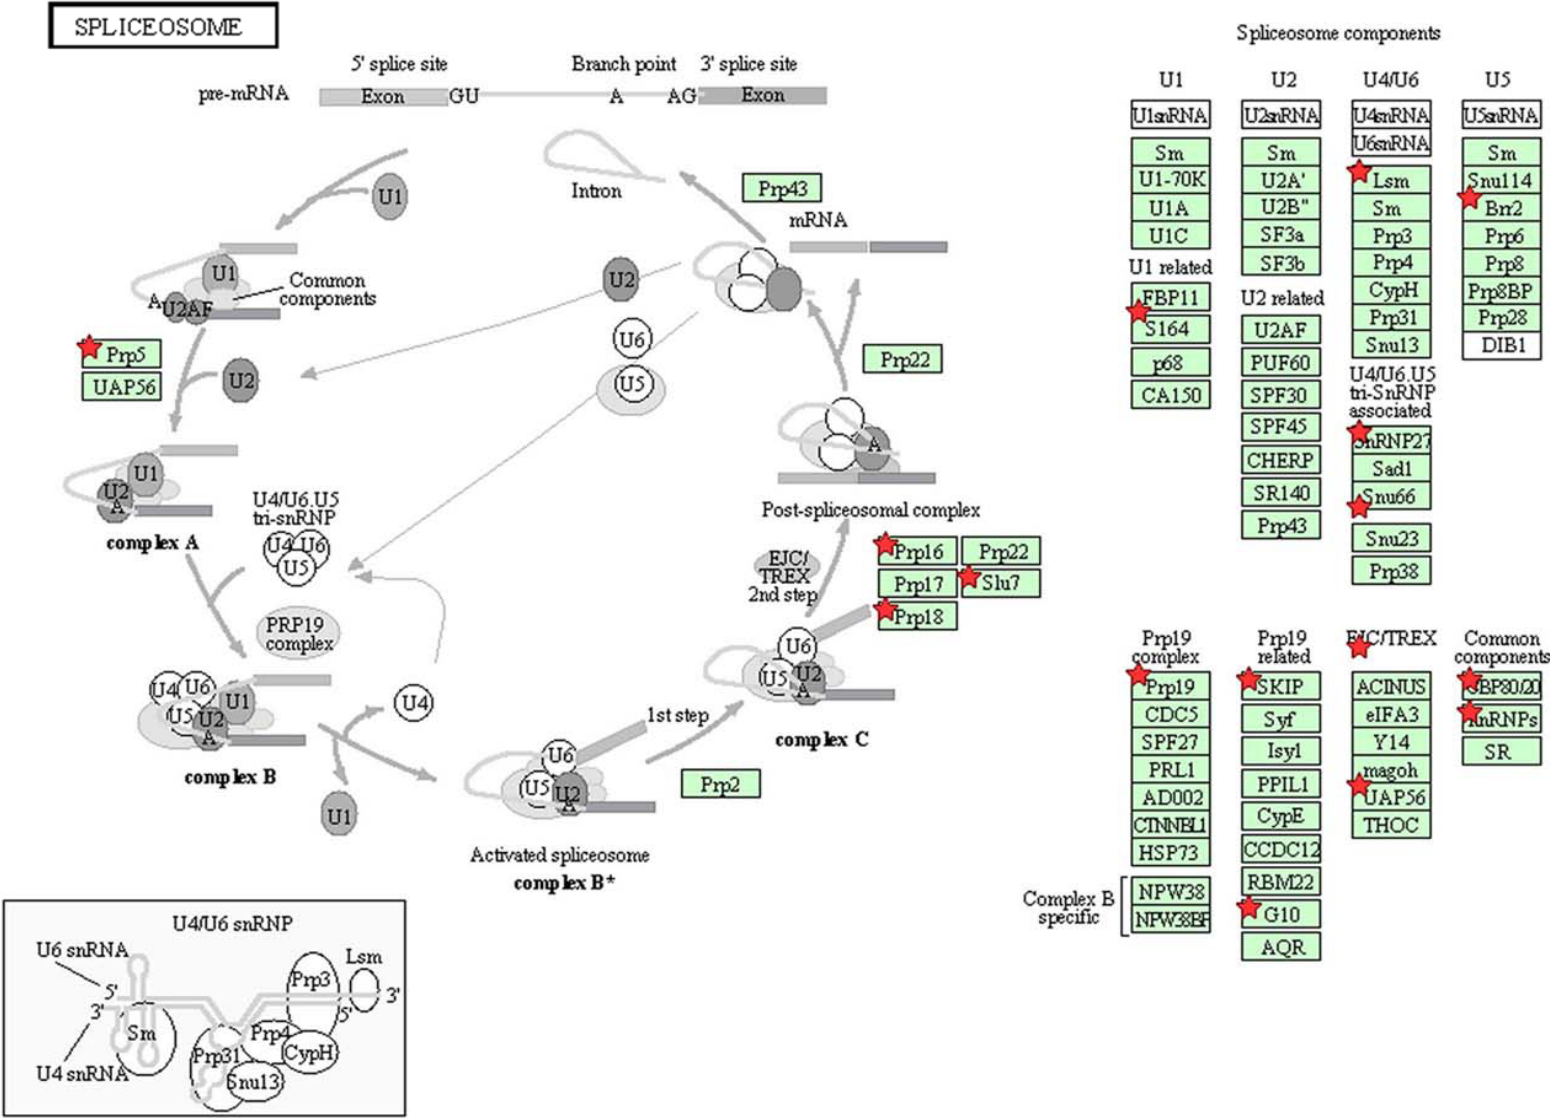

**Supplementary Figure 2. FUS mRNA targets and the ubiquitin-mediated proteolysis pathway.** Using the functional annotation tool DAVID, the ubiquitin-mediated proteolysis pathway annotated by KEGG was found to be significantly represented ( $p < 0.05$ ). Stars indicate FUS targets that are involved in this pathway.

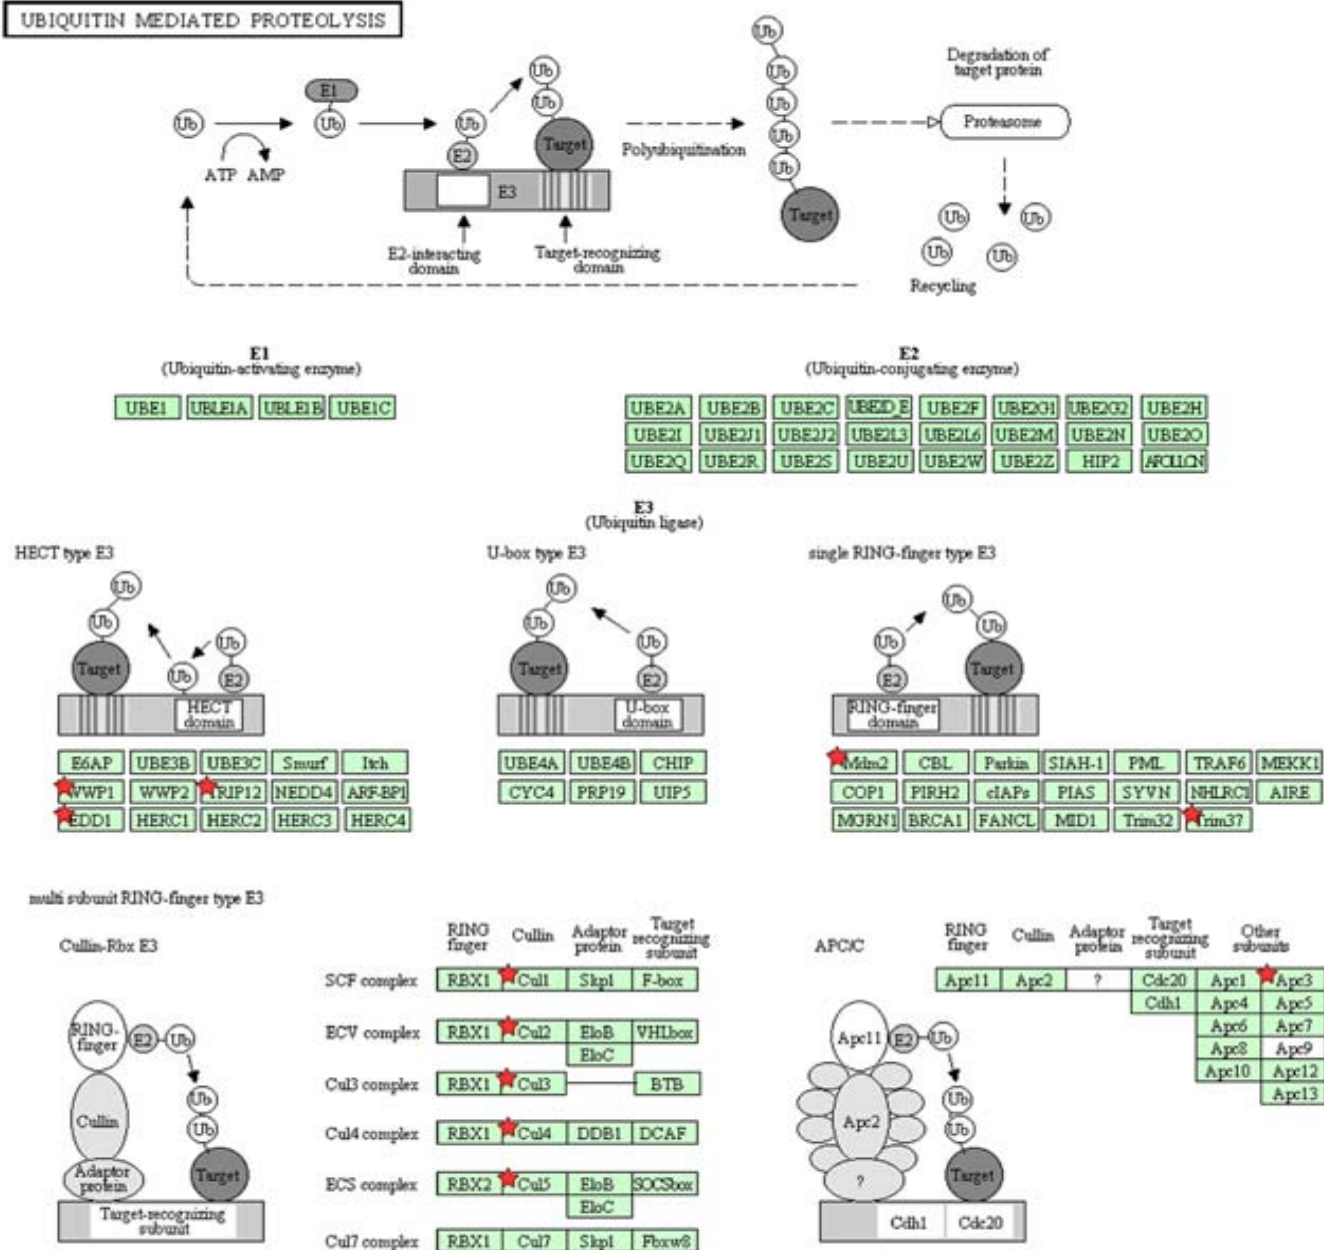

**Supplementary Table 3. List of mouse TDP-43 targets containing the (TG)<sub>n</sub> motif in their 3'UTR sequence as discovered by MEME/RSAT analysis. The gene symbol is indicated.**

|                      |                      |                |                |                 |                |
|----------------------|----------------------|----------------|----------------|-----------------|----------------|
| <i>1110032A03Rik</i> | <i>Chst15</i>        | <i>Gdi1</i>    | <i>Mapk14</i>  | <i>Rapgef11</i> | <i>Tmem65</i>  |
| <i>3110082I17Rik</i> | <i>Creb5</i>         | <i>Gm347</i>   | <i>Mcph1</i>   | <i>Reep4</i>    | <i>Trak1</i>   |
| <i>4930427A07Rik</i> | <i>Cry2</i>          | <i>Grn</i>     | <i>Mmab</i>    | <i>Rgl1</i>     | <i>Trmt61a</i> |
| <i>5930434B04Rik</i> | <i>Csnk1e</i>        | <i>Gsk3b</i>   | <i>Mobk12c</i> | <i>Rgs8</i>     | <i>Unc5b</i>   |
| <i>6330578E17Rik</i> | <i>Cyb5r1</i>        | <i>Gtpbp1</i>  | <i>Msl1</i>    | <i>Rhbdl3</i>   | <i>Unc5c</i>   |
| <i>Adam19</i>        | <i>D16Ert472e</i>    | <i>Hdac7</i>   | <i>Myadm</i>   | <i>Rnf219</i>   | <i>Ung</i>     |
| <i>Adamts4</i>       | <i>D19Wsu162e</i>    | <i>Hic2</i>    | <i>Nacc2</i>   | <i>Sept3</i>    | <i>Usf2</i>    |
| <i>Adcy6</i>         | <i>Dcaf12</i>        | <i>Hk2</i>     | <i>Ndr2</i>    | <i>Serpinb8</i> | <i>Utp23</i>   |
| <i>Adm</i>           | <i>Diras2</i>        | <i>Hlcs</i>    | <i>Neur11B</i> | <i>Sgms1</i>    | <i>Vax2</i>    |
| <i>Agpat4</i>        | <i>Dnajb1</i>        | <i>Igsf3</i>   | <i>Nfatc4</i>  | <i>Slc11a2</i>  | <i>Vegfa</i>   |
| <i>Ap2s1</i>         | <i>E2f1</i>          | <i>Igsf9</i>   | <i>Nrf1</i>    | <i>Slc25a46</i> | <i>Wdr59</i>   |
| <i>Arf3</i>          | <i>Eif1ad</i>        | <i>Ikzf4</i>   | <i>Nudcd3</i>  | <i>Slc6a8</i>   | <i>Wfs1</i>    |
| <i>Arhgap23</i>      | <i>Ets1</i>          | <i>Il11ra1</i> | <i>Orai1</i>   | <i>Spag7</i>    | <i>Wnt5a</i>   |
| <i>Arhgef15</i>      | <i>F730047E07Rik</i> | <i>Il17rd</i>  | <i>Pacs2</i>   | <i>Spock2</i>   | <i>Zcchc9</i>  |
| <i>Arl5b</i>         | <i>Fam168b</i>       | <i>Itpk1</i>   | <i>Pak4</i>    | <i>Ss18l1</i>   | <i>Zdhhc24</i> |
| <i>Armc8</i>         | <i>Fam178a</i>       | <i>Klf13</i>   | <i>Pdp2</i>    | <i>St3gal5</i>  | <i>Zdhhc7</i>  |
| <i>AW555464</i>      | <i>Fam53c</i>        | <i>Klhl21</i>  | <i>Pdpk1</i>   | <i>Stx16</i>    | <i>Zfp46</i>   |
| <i>B230312A22Rik</i> | <i>Fam78b</i>        | <i>L2hgdh</i>  | <i>Pfkfb2</i>  | <i>Tbc1d13</i>  | <i>Zfp689</i>  |
| <i>BC017612</i>      | <i>Fhod1</i>         | <i>Lasp1</i>   | <i>Plekha2</i> | <i>Tbc1d22b</i> | <i>Zxdc</i>    |
| <i>Ccdc25</i>        | <i>Fnbp1</i>         | <i>Ldlrad3</i> | <i>Prr3</i>    | <i>Tcf15</i>    |                |
| <i>Cd1d1</i>         | <i>Foxj3</i>         | <i>Lonrf1</i>  | <i>Rab8b</i>   | <i>Th1l</i>     |                |
| <i>Celf4</i>         | <i>Frat2</i>         | <i>Lrp8</i>    | <i>Rad51c</i>  | <i>Tmem179</i>  |                |
| <i>Chek1</i>         | <i>Fzd5</i>          | <i>Lrpprc</i>  | <i>Rap2a</i>   | <i>Tmem201</i>  |                |



**Supplementary Table 4. Common TDP-43 mRNA targets identified by our RIP-chip analysis and previous high-throughput RNA sequencing analyses.**

The reported binding region is indicated (3'UTR, 5'UTR, intronic, exonic).

|                      | <b>MEME/RSAT analysis</b><br>(TG) <sub>n</sub> motif in 3'UTR | <b>CLIP-seq</b><br>(Polymenidou et al., 2011) | <b>RIP-seq</b><br>(Septon et al., 2011) | <b>iCLIP-seq</b><br>(Tollervey et al., 2011) |
|----------------------|---------------------------------------------------------------|-----------------------------------------------|-----------------------------------------|----------------------------------------------|
| <i>Ccnt1</i>         | No                                                            |                                               | exonic                                  |                                              |
| <i>Celf4/Brunol4</i> | Yes                                                           |                                               | exonic                                  |                                              |
| <i>Ets1</i>          | Yes                                                           |                                               | exonic                                  |                                              |
| <i>Fnbp1</i>         | Yes                                                           |                                               | intronic, exonic                        |                                              |
| <i>Grn</i>           | Yes                                                           | 3'UTR                                         |                                         |                                              |
| <i>Gsk3b</i>         | Yes                                                           |                                               | intronic, exonic                        |                                              |
| <i>Igsf9</i>         | Yes                                                           |                                               | intronic                                |                                              |
| <i>Lrpprc</i>        | Yes                                                           |                                               | exonic                                  |                                              |
| <i>Ndgr2</i>         | Yes                                                           |                                               | intronic, exonic                        |                                              |
| <i>Prkg1</i>         | No                                                            | intronic                                      |                                         | intronic                                     |
| <i>Sept3</i>         | Yes                                                           |                                               | intronic                                |                                              |
| <i>Serpinbp8</i>     | Yes                                                           | intronic                                      |                                         |                                              |
| <i>Ss18l1</i>        | Yes                                                           |                                               | intronic, exonic                        |                                              |
| <i>Vegfa</i>         | Yes                                                           |                                               | intronic, exonic                        |                                              |
| <i>Zfp180</i>        | No                                                            | 5'UTR, intronic                               |                                         |                                              |

**Supplementary Table 5: Selected FUS mRNA targets identified by our RIP-chip analysis and by PAR-CLIP analysis (Hoell et al., 2011).**

The binding region (intron, coding, 3'UTR) identified by PAR-CLIP for FUS and mutant FUS is indicated.

| <b>Gene</b>  | <b>FUS</b>     | <b>Mutant FUS</b> |
|--------------|----------------|-------------------|
| <i>Atxn2</i> | intron         | coding            |
| <i>Nvl</i>   | intron         |                   |
| <i>Taf15</i> | intron, coding | intron, 3'UTR     |
| <i>Vps54</i> | intron, 3'UTR  |                   |





**Supplementary Figure 5. Effect of FUS depletion on VPS54 protein content.** *left*, representative Western blot of VPS54 in mock-transfected (siCTRL) and FUS-silenced (siFUS) NSC34 cells.  $\alpha$ -Tubulin was used for sample normalization. *right*, Densitometric analysis of Western blot data normalized to  $\alpha$ -Tubulin (n=4; mean  $\pm$  s.e.m).

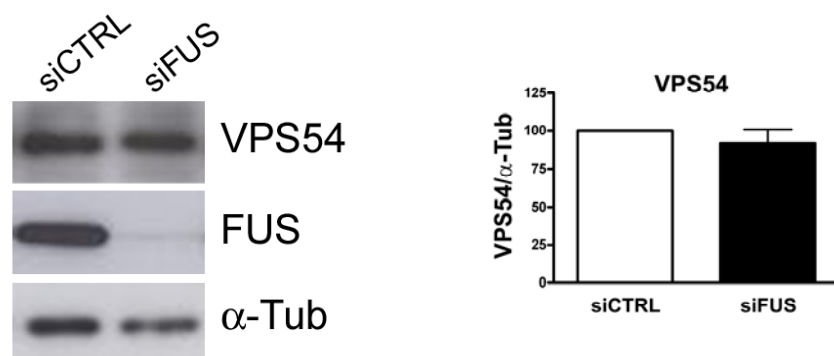

**Supplementary Table 6. Primer sequences for RT-PCR**

|                |                          |
|----------------|--------------------------|
| Atxn2 FOR      | TGCACGCTCTCCGCGGACCCAG   |
| Atxn2 REV      | ACAAAGTAAAAGTTTTCCCTTAAC |
| Gemin7 FOR     | TGTAGTGACATAATTCCTATTC   |
| Gemin7 REV     | CAAGCCTCAGGAATTTATTTCTG  |
| Grn_FL FOR     | CAAGACCGCTACTGTAAGGAAG   |
| Grn_FL REV     | GAAAGTGTACAAACTTTATTGGAG |
| Grn_del REV    | TGTGGCTCGGGAAGAGCACCTG   |
| Nrp FOR        | CCAGTGAGCTGTAATGTCGAGCG  |
| Nrp REV        | CATACCCTCTGGCCCCTTTCTTC  |
| Nvi FOR        | TGTTTGCGCTACCTGGCATGGAGG |
| Nvi REV        | CAAGTCTATCTATAATTTATTGAG |
| Optn FOR       | TCATTTGAGTGTTCTCTCCAGTC  |
| Optn REV       | GGGTTTGCAAGGTGTTTACTAAAC |
| Taf15 FOR      | CTGATGACTGTTTCAGATACTCC  |
| Taf15 REV      | AAGCAGCTTTTATTGCAGTATTAC |
| Vegfa_FL FOR   | GACGTGTAAATGTTCCCTGCAAA  |
| Vegfa_FL/D REV | GGAATATCTCGGAAAAGTCTGCTC |
| Vegfa_A FOR    | CTTTGTGGATCCCCATGATAGT   |
| Vegfa_B REV    | GAGATACATCTCATAAATAGTTG  |
| Vegfa_C FOR    | CAACTATTTATGAGATGTATCTC  |
| Vegfa_C REV    | CTTCTCAGGACAAGCTAGTGACTG |
| Vegfa_D FOR    | CAGTCACTAGCTTGTCCTGAGAAG |
| Vps54 FOR      | TGCACGCTCTCCGCGGACCCAG   |
| Vps54 REV      | TGGAGAAGAAGTGTGGCTTGAAGC |

**Supplementary Table 7. Primer sequences for Real time PCR**

|            |                           |
|------------|---------------------------|
| Atxn2 FOR  | CGGGTCCCATGCGTTCGTCCAC    |
| Atxn2 REV  | TGCTACTGTTCCGACCTCTGCC    |
| Fus FOR    | TCGACTGGTTTGATGGTAAAGAATT |
| Fus REV    | CGGCGGGTAGCAAATGAA        |
| Grn FOR    | CCA ACTACAGCTGCTGTAAC     |
| Grn REV    | CTCGTTATTCTAGGCCATGTG     |
| Nvl FOR    | AGCAGACCGTGTTGCCATATT     |
| Nvl REV    | CTTCATCCAGTGGAGGTTTGG     |
| Optn FOR   | CCTTGCAGCTCGCGATTT        |
| Optn REV   | ACTGTCTACTGCCTCCCTCTTCA   |
| Rpl10a FOR | GAAGAAGGTGCTGTGTCTGGC     |
| Rpl10a REV | TCGGTCATCTTCACGTGGC       |
| Taf15 FOR  | GGGACTGGGTTTGCCCTAA       |
| Taf15REV   | GCACTGATTACAGGAGTTTCTTCGA |
| Tardbp FOR | AGAGCTTTTGCCTTCGTACCT     |
| Tardbp REV | AAGAGACTGGGCAACCTTATCATC  |
| Vegfa FOR  | GGAGAGCAGAAGTCCCATGA      |
| Vegfa REV  | TCGCTGGTAGACATCCATGA      |
| Vps54 FOR  | AATGCAAGTTACAACTCCACTTG   |
| Vps54 REV  | GCTGTGACCAACCCATTTTGA     |
